# Supplementary material
Source: HighWire-hosted journal article supplement (https://jnm.snmjournals.org/highwire/filestream/103986/field_highwire_adjunct_files/0/261906_Supplemental_Data.pdf)
Supplement: 261906_Supplemental_Data.pdf [file 261906_Supplemental_Data.pdf]

**Supplemental Figure 1.** SUV<sub>max</sub> of normal organs divided by tumor load groups. Horizontal lines represent the median value.

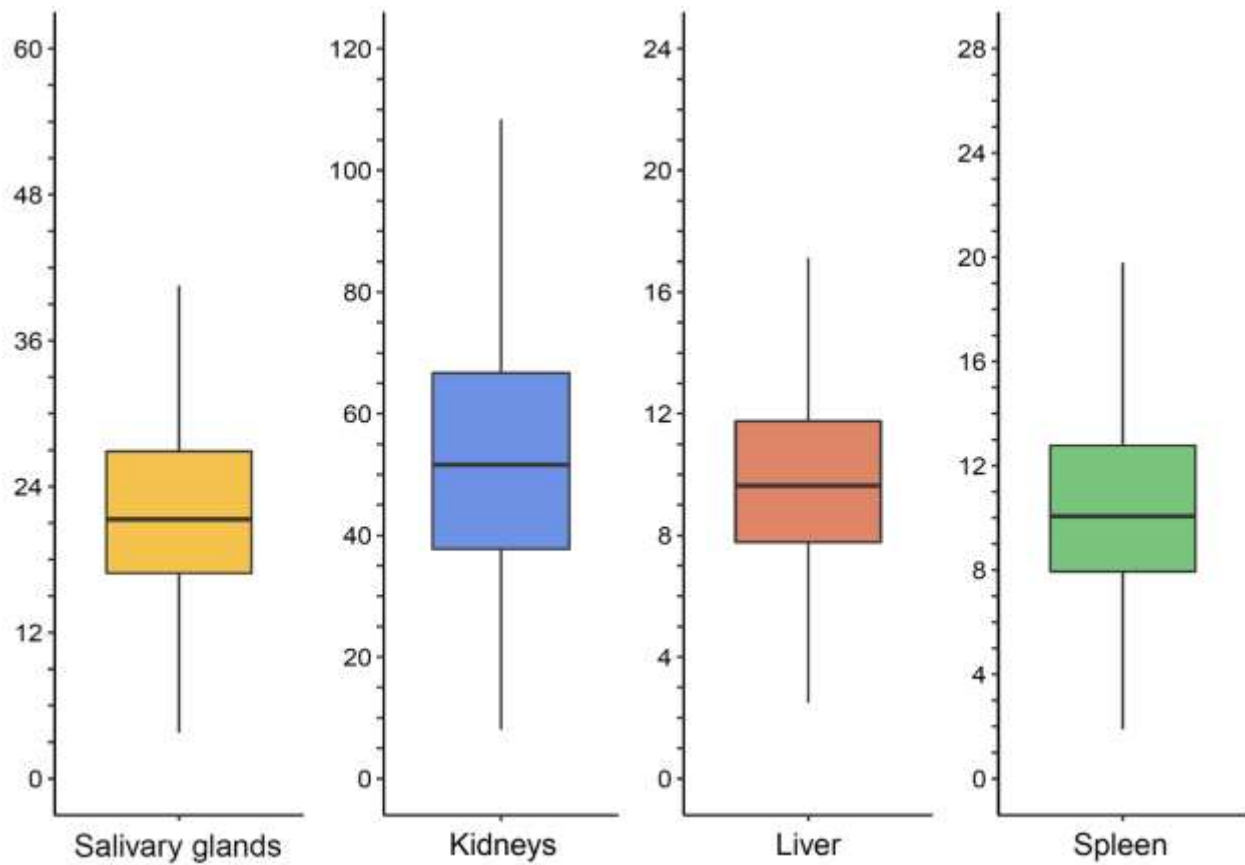

**Supplemental Figure 2.** SUV<sub>max</sub> of normal organs stratified by tumor load.

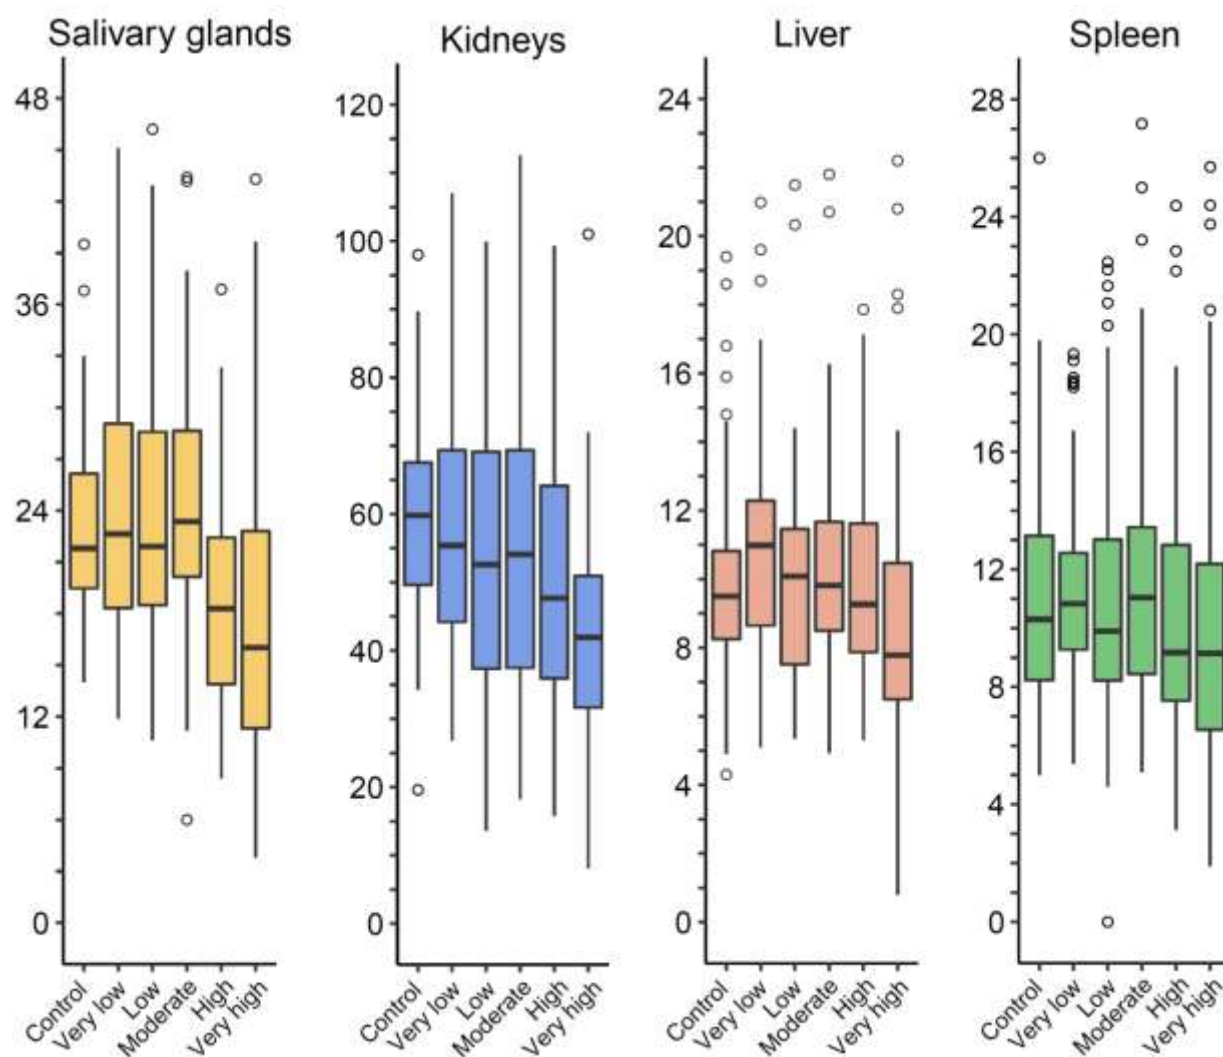

| No. Pts. | Center | PET/CT system                   | Tracer                | Matrix Size | Reconstruction algorithm | Point-Spread-Functions | Pixel size (mm) | EANM/SNMMI Guideline |
|----------|--------|---------------------------------|-----------------------|-------------|--------------------------|------------------------|-----------------|----------------------|
| N=124    | TUM    | Siemens, Biograph mCT           | <sup>68</sup> Ga-PSMA | 200x200     | PSF-TOF (3i, 21s)        | Yes                    | 4.06x4.06       | Yes                  |
| N=92     | UCLA   | Siemens, Biograph 64            | <sup>68</sup> Ga-PSMA | 200x200     | OSEM3D (2i, 24s)         | No                     | 4.06x4.06       | Yes                  |
| N=88     | UKE    | Siemens, Biograph mCT           | <sup>68</sup> Ga-PSMA | 200x200     | PSF-TOF (3i, 21s)        | Yes                    | 4.06x4.06       | Yes                  |
| N=50     | PMCC   | General Electric, Discovery 710 | <sup>68</sup> Ga-PSMA | 192x192     | VPFXS                    | Yes                    | 2.9x2.9         | Yes                  |
| N=32     | UKH    | Siemens, Biograph mCT           | <sup>68</sup> Ga-PSMA | 200x200     | PSF-TOF (2i, 21s)        | Yes                    | 4.06x4.06       | Yes                  |
| N=20     | EDNOC  | Siemens, Biograph 16            | <sup>68</sup> Ga-PSMA | 168x168     | OSEM3D (2i, 24s)         | No                     | 4.06x4.06       | Yes                  |

**Supplemental Table 1.** Overview of the applied reconstruction parameters.

Abbreviations: TUM, Technical University Munich; UKE, University Hospital Essen; PMCC, Peter MacCallum Cancer Center; UKH, University Hospital Heidelberg; EDNOC, Excel Diagnostics Nuclear Oncology Center; PSF, point-spread-function.

| Subgroup              | PSMA-VOL |      |   | NL | SUVmean         |       |         |       |       |       |        |       | SUVmax          |       |         |       |       |       |        |       |
|-----------------------|----------|------|---|----|-----------------|-------|---------|-------|-------|-------|--------|-------|-----------------|-------|---------|-------|-------|-------|--------|-------|
|                       |          |      |   |    | Salivary Glands |       | Kidneys |       | Liver |       | Spleen |       | Salivary Glands |       | Kidneys |       | Liver |       | Spleen |       |
|                       | Bsl      | %    |   |    | Bsl             | %     | Bsl     | %     | Bsl   | %     | Bsl    | %     | Bsl             | %     | Bsl     | %     | Bsl   | %     | Bsl    | %     |
| PSMA-VOL decline ≥30% | 2007     | -65% | - |    | 11.0            | +15%  | 21.0    | +12%  | 3.5   | +103% | 6.5    | +11%  | 6.8             | +85%  | 18.5    | +455  | 5.2   | +60%  | 6.1    | +49%  |
|                       | 3716     | -64% | - |    | 6.9             | +112% | 13.2    | +71%  | 1.2   | +100% | 2.8    | +118% | 32.4            | +20%  | 71.6    | +10%  | 9.6   | +35%  | 12.8   | +93%  |
|                       | 2038     | -55% | - |    | 14.2            | +31%  | 28.9    | +18%  | 3.2   | +58%  | 4.0    | +81%  | 19.4            | -17%  | 26.7    | +0%   | 8.8   | +7%   | 9.4    | +12%  |
|                       | 2136     | -55% | - |    | 8.6             | +33%  | 20.7    | -16%  | 2.9   | +3%   | 3.5    | +37%  | 27.6            | -12%  | 57.0    | -1%   | 13.9  | +19%  | 13.0   | +1%   |
|                       | 3305     | -47% | - |    | 3.8             | +84%  | 10.7    | +42%  | 2.5   | +80%  | 3.5    | +65%  | 35.7            | +6%   | 72.0    | +6%   | 10.7  | +16%  | 12.0   | +28%  |
|                       | 2323     | -40% | - |    | 7.7             | -18%  | 10.4    | +31%  | 1.8   | +22%  | 4.2    | +31%  | 19.3            | -24%  | 49.2    | -23%  | -     | -     | 16.0   | -27%  |
|                       | 2483     | -40% | - |    | 4.4             | +14%  | 19.9    | -8%   | -     | -     | 8.5    | -26%  | 3.8             | +445% | 8.1     | +195% | 1.5   | +260% | 1.9    | +147% |
|                       | 2004     | -39% | - |    | 10.6            | +52%  | 31.2    | +3%   | 3.5   | +31%  | 6.0    | +77%  | 18.3            | +26%  | 43.4    | -14%  | 6.8   | +15%  | 9.3    | +8%   |
|                       | 1432     | -36% | + |    | 7.8             | +4%   | 35.2    | -12%  | 5.3   | +5%   | 5.4    | +52%  | 14.8            | +162% | 23.5    | +126% | 6.3   | +65   | 6.4    | +72%  |
|                       | 4251     | -31% | - |    | 1.6             | +294% | 3.6     | +219% | 0.4   | +275% | 0.8    | +175% | 17.4            | +5%   | 66.1    | -12%  | 12.2  | -95   | 11.6   | +17%  |
| PSMA-VOL decline <30% | 3369     | -28% | + |    | 6.8             | +7%   | 15.0    | -7%   | 1.6   | -17%  | 1.5    | -22%  | 21.6            | -21%  | 28.9    | +7%   | 10.5  | -62%  | 9.2    | +2%   |
|                       | 2069     | -25% | - |    | 10.7            | -3%   | 31.2    | +17%  | 2.7   | -4%   | 4.9    | -22%  | 24.2            | -49%  | 21.3    | +23%  | 3.5   | +40%  | 3.2    | +74%  |
|                       | 1549     | -18% | + |    | 7.2             | -18%  | 19.0    | -3%   | 3.5   | +43%  | 9.8    | -15%  | 10.2            | +34%  | 40.5    | +16%  | 5.8   | +84%  | 7.5    | +33%  |
|                       | 2805     | -3%  | - |    | 5.1             | +19%  | 23.1    | -7%   | 1.0   | +32%  | 1.6    | +39%  | 18.5            | -37%  | 55.7    | -23%  | 22.2  | -48%  | 24.4   | -39%  |
|                       | 2877     | 4%   | + |    | 8.3             | -4%   | 11.2    | -7%   | 2.4   | -18%  | 5.7    | +21%  | 9.5             | +9%   | 46.0    | -15%  | 4.2   | +14%  | 4.0    | +16%  |
|                       | 3027     | 8%   | + |    | 5.1             | +10%  | 11.2    | +33%  | 1.2   | +23%  | 1.1    | +168% | 21.4            | -39%  | 35.1    | -15%  | 7.8   | -46%  | 3.5    | -22%  |
|                       | 1891     | 13%  | + |    | 9.2             | -44%  | 21.1    | +14%  | 6.1   | -25%  | 12.0   | -29%  | 11.0            | -11%  | 55.6    | +15%  | 4.8   | -6%   | 3.5    | +46%  |
|                       | 3108     | 14%  | + |    | 6.3             | -9%   | 29.7    | +16%  | 2.0   | +39%  | 1.9    | +71%  | 10.9            | -1%   | 24.0    | +28%  | 5.8   | -43%  | 5.7    | -7%   |
|                       | 1978     | 30%  | - |    | 5.6             | +7%   | 21.9    | +13%  | 2.6   | +27%  | 3.8    | +8%   | 17.2            | -21%  | 46.0    | -19%  | 20.8  | -54%  | 17.7   | -24%  |
|                       | 1964     | 69%  | + |    | 5.5             | +9%   | 13.6    | +38%  | 1.8   | +17%  | 3.0    | +19%  | 23.9            | -14%  | 57.7    | +16%  | 7.7   | -6%   | 9.9    | -13%  |

**Supplemental Table 2.** PSMA-VOL, SUVmean and SUVmax of normal organs in <sup>68</sup>Ga-PSMA-11 PET/CT of 20 patients who received a baseline and follow-up scan during <sup>177</sup>Lu-PSMA RLT. Abbreviations: PSMA-VOL, PSMA-avid tumor volume; NL, new lesions; Bsl, baseline; %, percentage change on the follow-up PET scan relative to baseline.
